# Supplementary material
Source: publisher site journal article supplement (https://www.dovepress.com/article/391816)
Supplement: Supplementary file 1 [file 391816-appendix-1.pdf › 391816-appendix-1.pdf]

## INFORMATION SHEET FOR PARTICIPANTS

*You will be given an electronic copy of this information sheet*

We would like to invite you to participate in this research project. You should only participate if you want to; choosing not to take part will not disadvantage you in any way.

Before you decide whether you want to take part, it is important for you to understand why the research is being done and what your participation will involve. Please take time to read the following information carefully and discuss it with others if you wish. Ask us if there is anything that is not clear or if you would like more information.

### ***What is the purpose of this study?***

*This study aims to ascertain whether different online teaching modalities affect knowledge attainment in third year medical students.*

*We will also assess levels of enjoyment and engagement among third year medical students in each of the online tutorial formats.*

### ***Who is eligible for this study?***

*Third year medical students at Imperial College London.*

### ***What will I have to do?***

*Following the tutorials, you will be asked to take part in a 60-minute formative assessment via mentimeter. This will be followed by a short questionnaire to assess your engagement and enjoyment of each of the teaching modalities.*

### ***Do I have to take part?***

*While attendance at these online teaching sessions, formative assessment and engagement questionnaire are compulsory as part of the Imperial College Teaching Programme, it is not compulsory for your data to be used as part of the study. We will obtain consent from you at the start of the formative assessment.*

### ***How will you maintain my confidentiality?***

*After the formative assessment and engagement questionnaire via Mentimeter, responses will be collected and anonymised. These responses will be stored securely in line with Imperial College's governance clearance (GDPR) guidelines.*

*If you wish to withdraw your data from the research study, you can do this up to two weeks after the completion of the assessment by emailing one of the researchers below. Beyond 2 weeks, we will be unable to remove your data as it will be already anonymised.*

***What are the possible disadvantages or risks of taking part?***

*Some students may feel less prepared than others going in to the formative assessment. However, **the formative assessment will have no bearing on medical school progression and will not be used in any way to disadvantage you going forward.** Furthermore, the assessment will take place remotely, at a place convenient to you. You are familiar with Mentimeter as a quiz platform so hope you will find this method of assessment comfortable.*

***What are the possible benefits of taking part?***

*You will get the opportunity to participate in a formative assessment and gain feedback on performance. You will have the opportunity to participate in educational research. You will have the opportunity to take part in a variety of remote teaching sessions.*

***Do you plan to publish this data?***

*Our research findings may be disseminated through internal reports, academic publication and conference proceedings. However, all responses are anonymised and will not be attributed to participants who will remain unidentifiable.*

If you have any questions or require more information about this study, please contact the researcher using the following contact details:

Co-Investigator 1: Ashlyn Stackhouse – [ashlyn.stackhouse12@imperial.ac.uk](mailto:ashlyn.stackhouse12@imperial.ac.uk)  
Co-Investigator 2: Damir Rafi – [d.rafi@imperial.ac.uk](mailto:d.rafi@imperial.ac.uk)

**Thank you for taking the time to read and consider this information.**
