# Supplementary material
Source: publisher site journal article supplement (https://www.dovepress.com/article/391816)
Supplement: Supplementary file 2 [file 391816-appendix-2.pdf › 391816-appendix-2.pdf]

## **Appendix 2: Mentimeter Questions Relating to Enjoyment / Engagement of the Different Tutorials.**

Note: These questions will be asked **via mentimeter** immediately after the knowledge attainment questions have been asked.

These next questions relate to the Online Teaching you have received. As part of the research trial, we are asking participants how engaging and enjoyable they found each mode of online teaching.

The results of this questionnaire will help us to ascertain better how successful, or otherwise, each form of online teaching was. If you do not wish to provide feedback, please leave these answers blank.

Thank you.

**Our definition of engagement (from Merriam-Webster Dictionary): The ability to hold one's attention.**

**Our definition of enjoyment (from Merriam-Webster Dictionary): To have a good time.**

### **1. How engaging did you find the HoloLens as a teaching tool?**

“ 1      “ 2      “ 3      “ 4      “ 5

Not at all

Very Much

### **2. How enjoyable did you find the HoloLens online tutorial as a teaching tool?**

“ 1      “ 2      “ 3      “ 4      “ 5

Not at all

Very Much

### **3. How engaging did you find the Case Vignette Tutorial as a teaching tool?**

“ 1      “ 2      “ 3      “ 4      “ 5

Not at all

Very Much

### **4. How enjoyable did you find the Case Vignette Tutorial as a teaching tool?**

“ 1      “ 2      “ 3      “ 4      “ 5

Not at all

Very Much

### **5. How engaging did you find the Patient-Testimony (Speaking Clinically) Tutorial as a teaching tool?**

“ 1      “ 2      “ 3      “ 4      “ 5

Not at all

Very Much

**6. How enjoyable did you find the Patient-Testimony (Speaking Clinically) Tutorial as a teaching tool?**

~ 1 ~ 2 ~ 3 ~ 4 ~ 5

Not at all

Very much

**7. Which tutorial style was your favourite of the three different tutorials?**

- HoloLens tutorial
- Patient-Testimony video vignette
- Case vignette

**8. Please rank these methods of delivery in order of how engaging you found the teaching tool.**

- HoloLens tutorial
- Patient-Testimony video vignette
- Case vignette
